# Supplementary material for: The cnidarian-bilaterian ancestor possessed at least 56 homeoboxes: evidence from the starlet sea anemone, Nematostella vectensis
Source: Springer Nature journal article supplement (doi:10.1186/gb-2006-7-7-r64), 2006-07-24

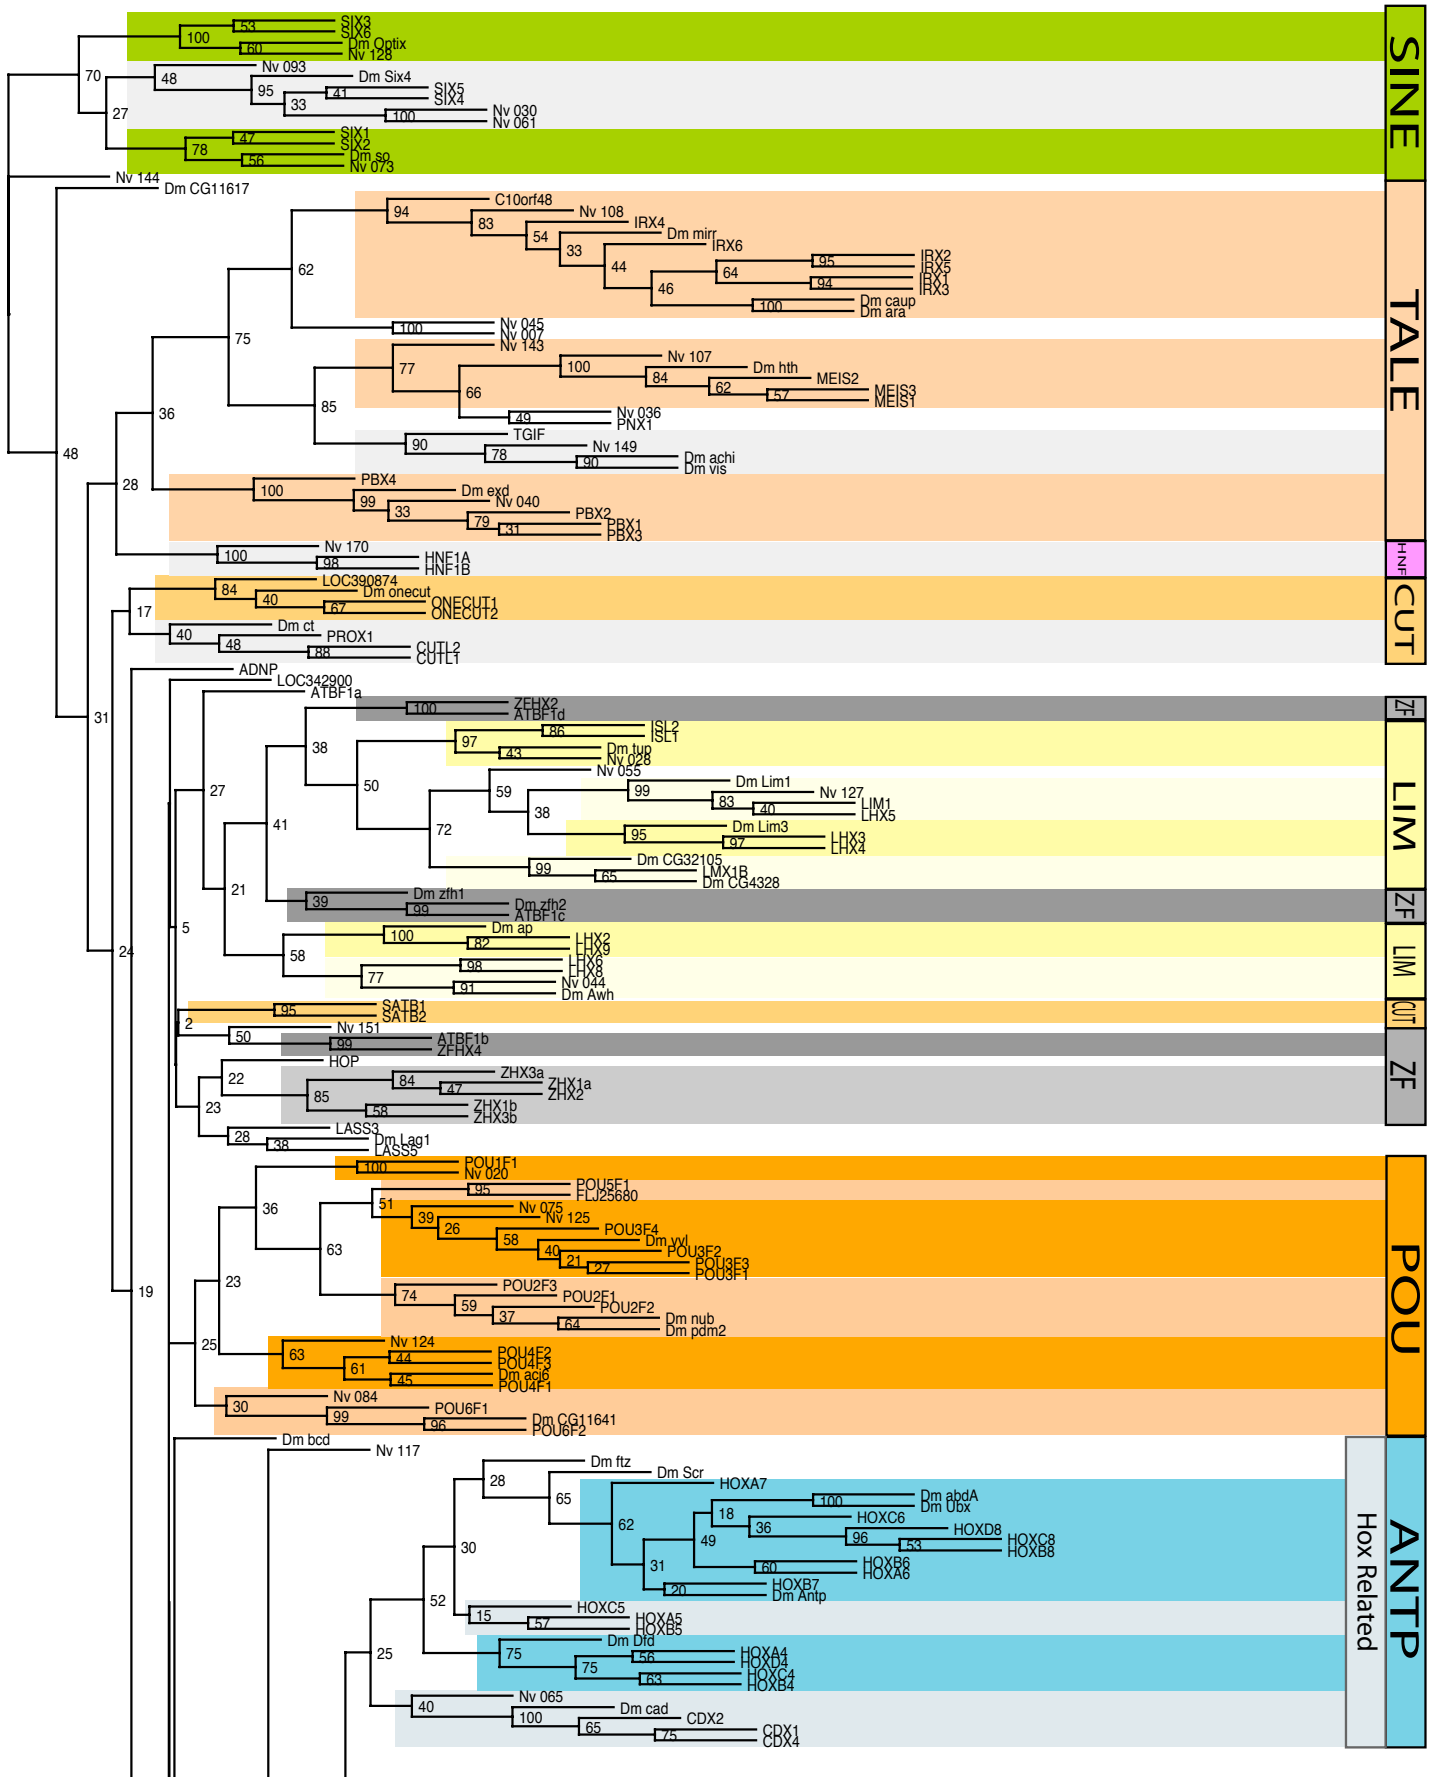



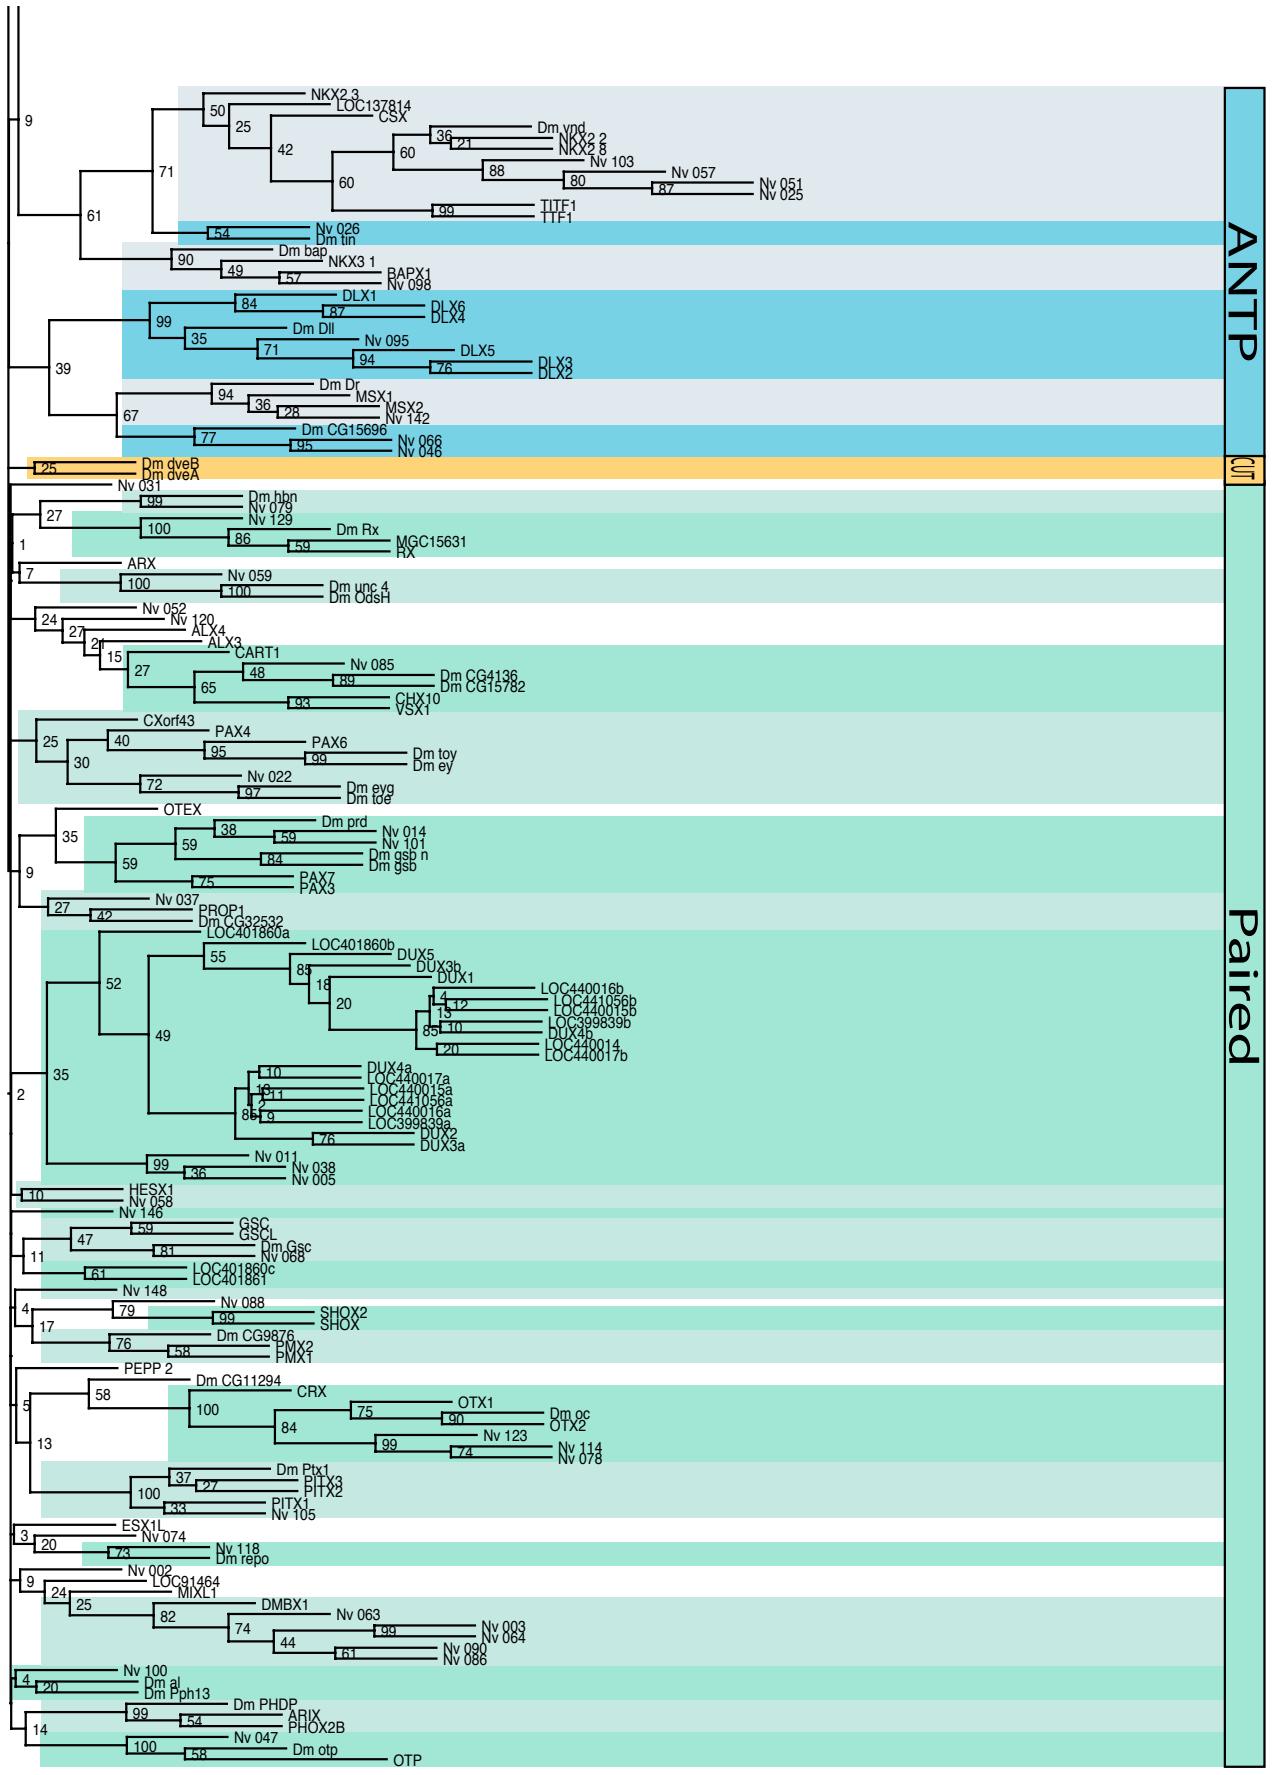

Supplement: Additional file 3 [file gb-2006-7-7-r64-s3.pdf]
